# Supplementary material
Source: PubMed Central journal article supplement (PMC2885189)

## SUPPLEMENTAL FIGURE LEGENDS

**Figure S1** HRG- $\beta$ 1 induces FABP5 promoter activity in a dose-dependent manner. MCF-7 cells were transiently transfected with a luciferase reporter driven by an 800 bp of the proximal FABP5 promoter. Cells were treated with varying doses of HRG- $\beta$ 1 for 16 hr., lysed and analyzed for luciferase activity. Luciferase activity was normalized to  $\beta$ -galactosidase. Data are mean $\pm$ S.D (n=3).

**Figure S2** HRG- $\beta$ 1-induced FABP5 promoter activity is mediated by ERK, PI3K and NF- $\kappa$ B. MCF-7 cells were transiently transfected with a luciferase reporter driven by an 800 bp of the proximal FABP5 promoter. Cells were pre-treated with PD (20  $\mu$ M), wortmannin (100 nM), or PDTC (100  $\mu$ M) for 1 hr. prior to the addition of HRG- $\beta$ 1 (30 ng/ml, 16 hr.). Cells were lysed and analyzed for luciferase activity. Luciferase activity was normalized to  $\beta$ -galactosidase. Data are mean $\pm$ S.D (n=3).

**Figure S3** KLF2 suppresses FABP5 promoter activity. MCF-7 cells were transiently transfected with a luciferase reporter driven by an 800 bp of the proximal FABP5 promoter. Cells were infected with Ad-KLF2 or Ad-GFP 24 hr. prior to treatment with HRG- $\beta$ 1 for 16 hr. Cells were lysed and analyzed for luciferase activity. Luciferase activity was normalized to  $\beta$ -galactosidase. Data are mean $\pm$ S.D (n=3).

**Figure S4** Decreasing the expression level of FABP5 hampers the ability of HRG- $\beta$ 1 to activate PPAR $\beta$ / $\delta$ . MCF-7 cells were transiently transfected with a luciferase reporter driven by 3X PPRE, and by an expression vector for PPAR $\beta$ / $\delta$ . Cells were treated with HRG- $\beta$ 1 for 16 hr., lysed and analyzed for luciferase activity. Luciferase activity was normalized to  $\beta$ -galactosidase. Data are mean $\pm$ S.D. of two independent experiments carried out in triplicates. \*p=0.04 vs. HRG- $\beta$ 1 control.

**Figure S5** FABP5 mediates HRG- $\beta$ 1-induced proliferation of MDA-MB453 mammary carcinoma cells. **(a)** MDA-MB453 cells were serum-starved for 24 hr. and treated with HRG- $\beta$ 1 (30 ng/ml) for 4 hr. FABP5 mRNA levels were assessed by Q-PCR and normalized to 18S RNA. mean $\pm$ S.D (n=3). **(b)** MDA-MB453 cells were infected with an empty lentivirus or lentivirus harboring FABP5shRNA. 3 days following infection, cells were treated with HRG- $\beta$ 1 for 24 hr. Cell proliferation was assessed by cell counting. Data are mean $\pm$ S.D. (n=3) \*p=0.0004. Inset: immunoblot demonstrating decreased expression of FABP5.

Fig. S1

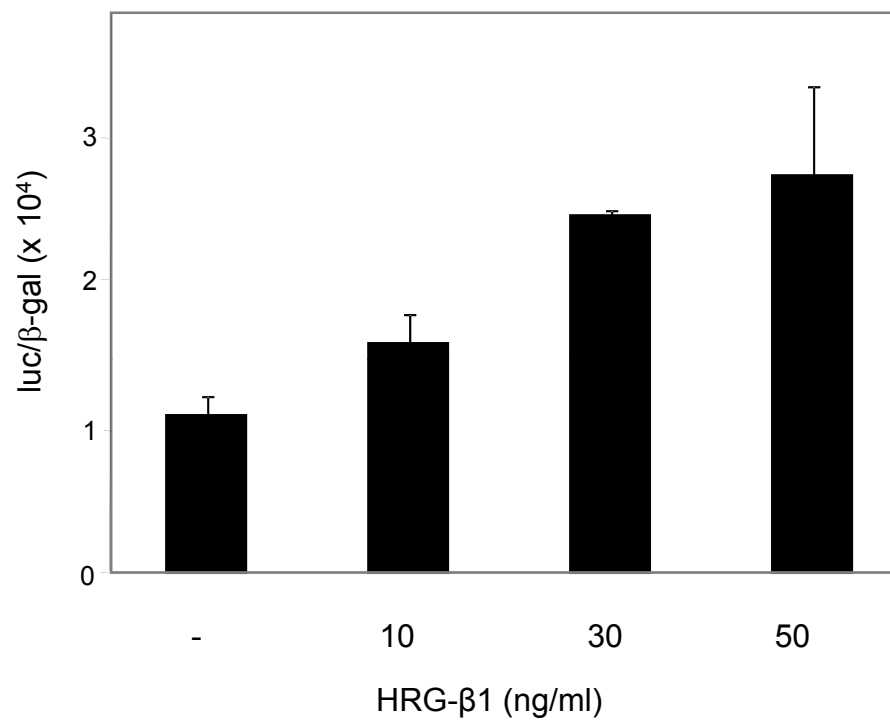

Fig. S2

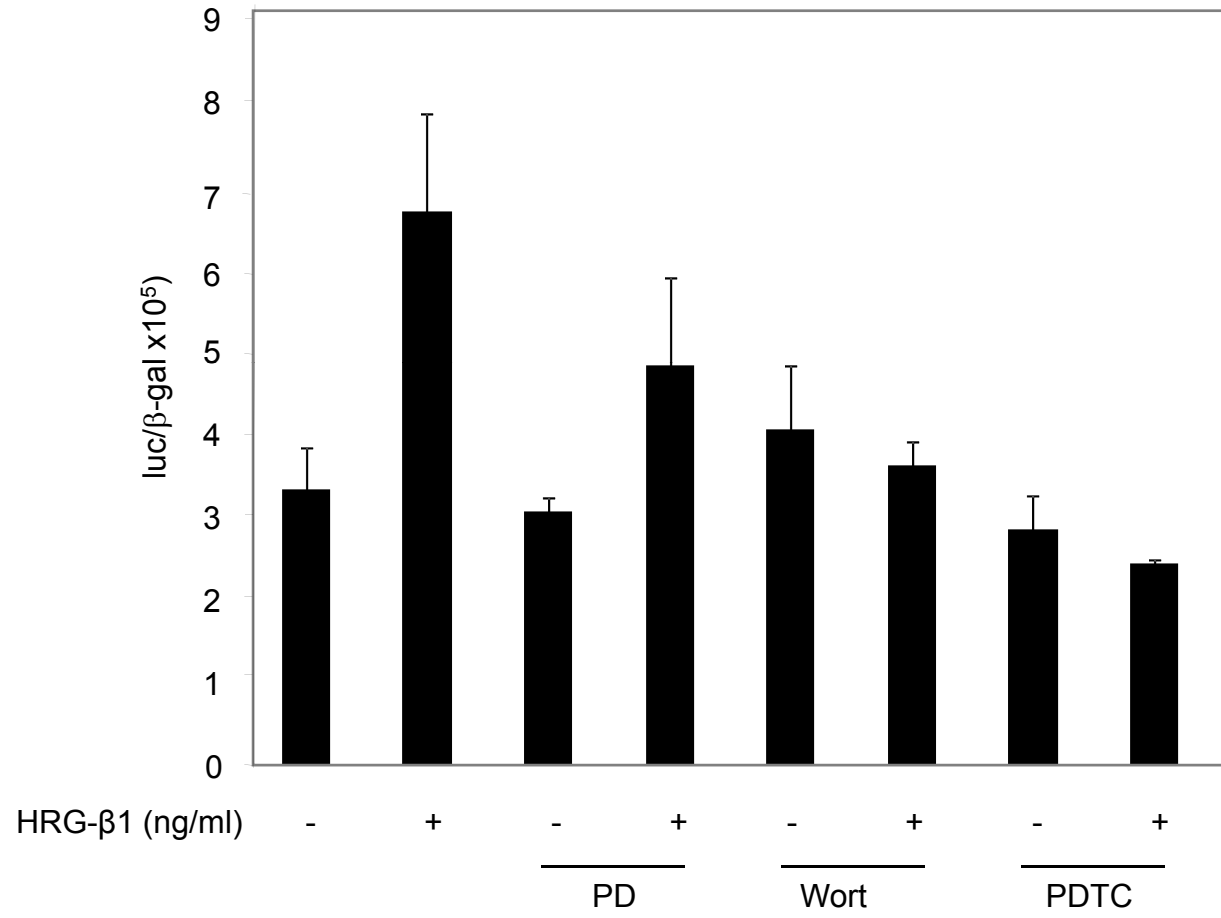

Fig. S3

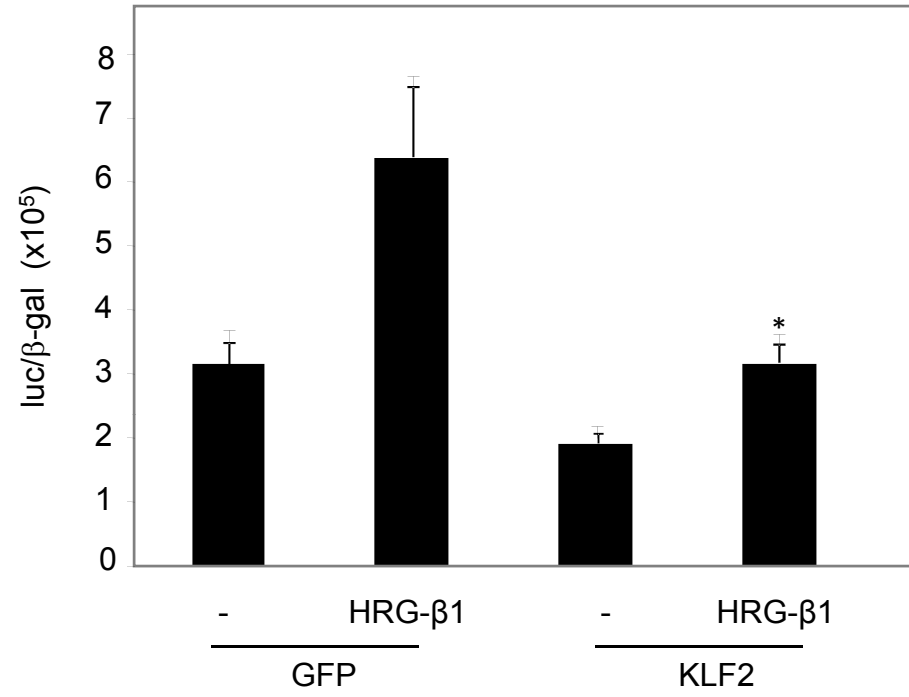

Fig. S4

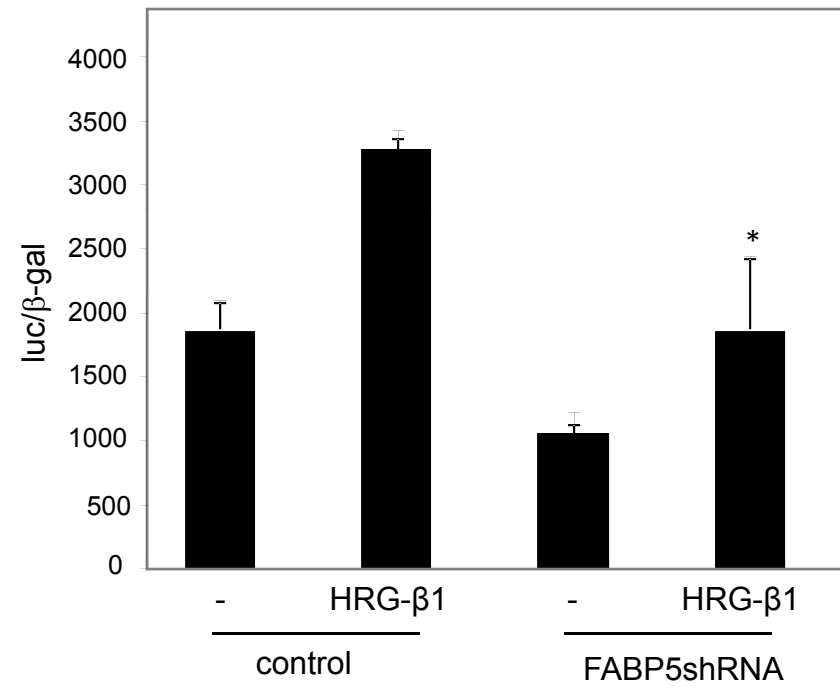

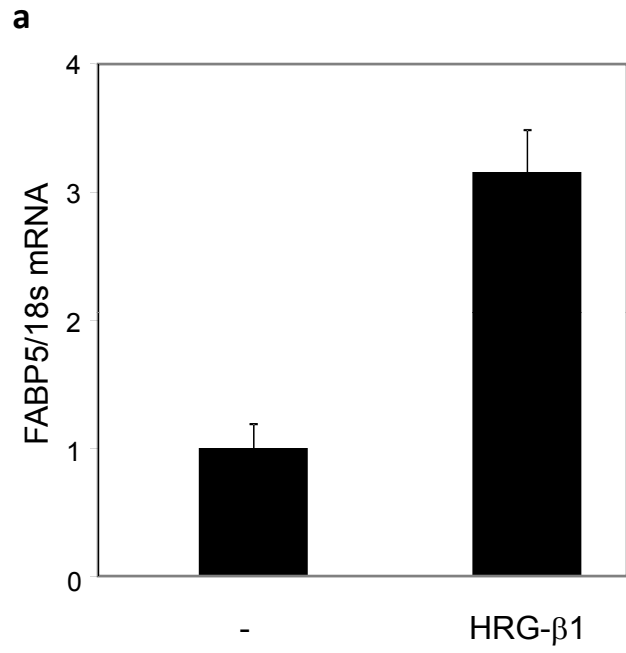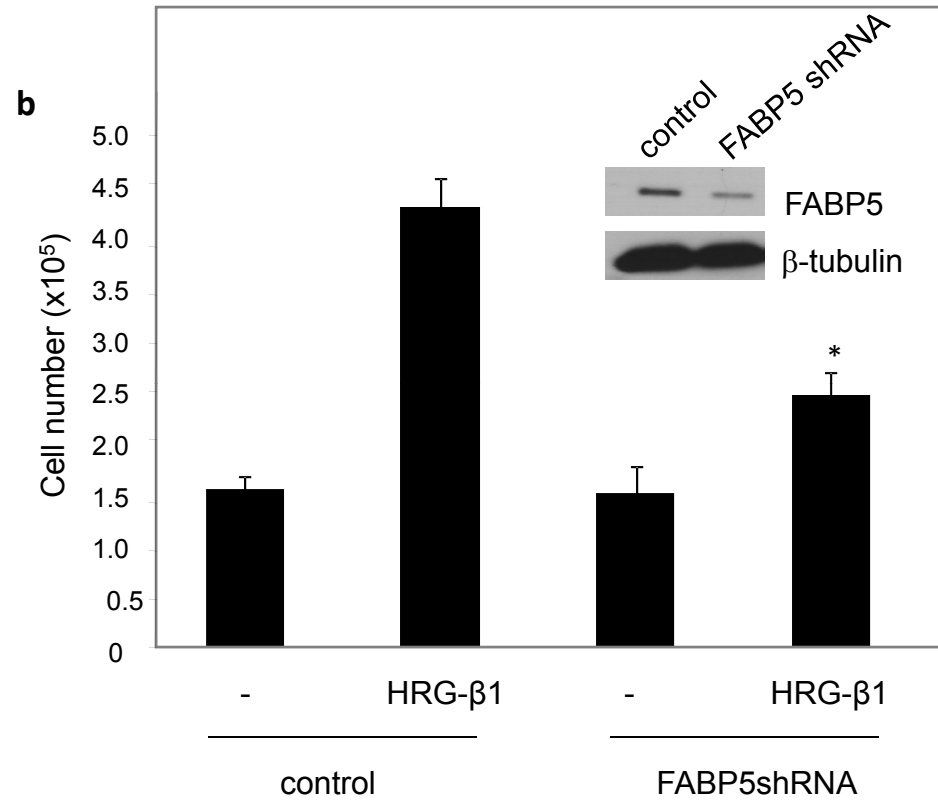

Supplement: supp_M109.099770_jbc.M109.099770-1.pdf [file supp_M109.099770_jbc.M109.099770-1.pdf]
